# Supplementary material
Source: Springer Nature journal article supplement (https://www.springermedizin.de/resource/supplementary/13014_2014_1155_MOESM4_ESM.pdf/9635000)

**A**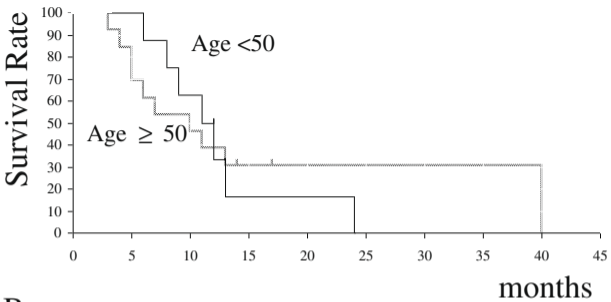**B**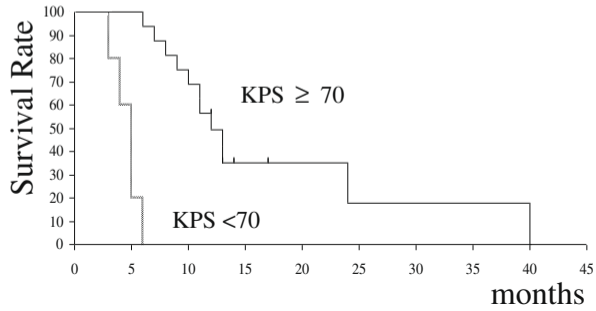**C**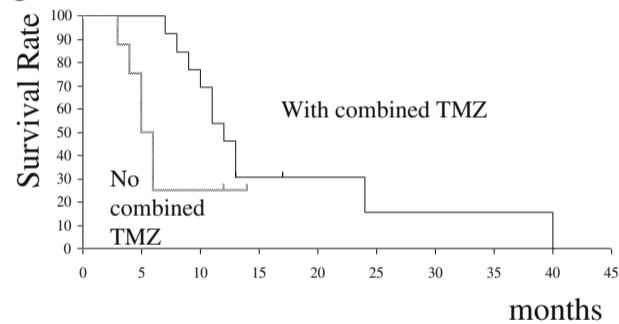

Supplement: MOESM4 [file 9635000]
